# Supplementary material for: Examining the Different Effects of Multi Sport Games
Source: Research Square preprint supplement (doi:10.21203/rs.3.rs-7544287/v1), 2025-10-22
Supplement: Supplementary file 1 [file 9f903c7f4de4a477219e390e.docx]

**Supplementary File 1**

**Title: Questionnaire on the Effects of Multi Sport Games**

**Developer:** Savaş Erel (Doctoral Dissertation, Bayburt University, 2024)

**Description:**

This questionnaire was developed as part of the doctoral dissertation by the first author. It aims to examine the effects of multi sport games in various domains. The instrument includes demographic questions and 30 items under five sub-dimensions. All items are rated on a 5-point Likert scale (1 = Strongly Disagree, 2 = Disagree, 3 = Neutral, 4 = Agree, 5 = Strongly Agree).

**“Supplementary File 1: Multi Sport Games Effect Scale”**

| **Section I. Demographic Information**  **•** Gender: ☐ Female ☐ Male  • Age: ____  • Occupation: ____  • Education level: ☐ Middle School ☐ High School ☐ University ☐ Graduate  • Monthly income: ☐ 8,500 TRY ☐ 8,600–17,000 TRY ☐ Above 17,000 TRY  • Province participated in: ☐ Samsun ☐ Konya  • Do you engage in multi sport games? ☐ Yes ☐ No | | | | | | | |
| --- | --- | --- | --- | --- | --- | --- | --- |
|  | | **Section II. Multi Sport Games Effect Scale** | **I Defınıtely Do Not Agree** | **I Disagree** | **I neither agree nor disagree.** | **I Agree** | **I absolutely agree** |
| Social | 1 | Contributed to improving the appearance of our city. |  |  |  |  |  |
| 2 | Enabled the opening of new facilities for public use in our city. |  |  |  |  |  |
| 3 | Helped the public to meet different people and cultures. |  |  |  |  |  |
| 4 | Encouraged greater social cohesion among city residents. |  |  |  |  |  |
| 5 | Provided local people with the opportunity to participate in an international event. |  |  |  |  |  |
| 6 | Enhanced the international recognition of the city. |  |  |  |  |  |
| Political | 7 | Contributed to the formation of a national identity. |  |  |  |  |  |
| 8 | Created a positive image of the country. |  |  |  |  |  |
| 9 | Had a positive effect on bilateral relations between countries. |  |  |  |  |  |
| 10 | Facilitated the establishment of diplomatic relations. |  |  |  |  |  |
| 11 | Increased the importance of sport in national politics. |  |  |  |  |  |
| 12 | Increased the importance of sport in international politics. |  |  |  |  |  |
| SPORTS | 13 | Increased public interest in sports. |  |  |  |  |  |
| 14 | Increased interest in hosting international organizations. |  |  |  |  |  |
| 15 | Increased the number of social activity facilities in the city. |  |  |  |  |  |
| 16 | Contributed to the improvement of the host country’s sports achievements. |  |  |  |  |  |
| 17 | Contributed to the promotion of different sports branches. |  |  |  |  |  |
| 18 | Contributed to continuity in sports participation. |  |  |  |  |  |
| EKONOMİC | 19 | Contributed to the development of the city. |  |  |  |  |  |
| 20 | Increased the tourism potential of the city. |  |  |  |  |  |
| 21 | Provided prestige to the host country. |  |  |  |  |  |
| 22 | Encouraged investment in the city. |  |  |  |  |  |
| 23 | Contributed to the improvement of public transportation services (minibuses, municipal buses). |  |  |  |  |  |
| 24 | Contributed to the city’s economic situation. |  |  |  |  |  |
| Negative Environmental | 25 | Increased visual pollution. |  |  |  |  |  |
| 26 | Damaged the ecosystem. |  |  |  |  |  |
| 27 | Negatively affected the environment. |  |  |  |  |  |
| Positive Environmental | 28 | Contributed to the protection of natural resources in the city. |  |  |  |  |  |
| 29 | Contributed to the preservation of historical and touristic resources in the city. |  |  |  |  |  |
| 30 | Contributed to the improvement of environmental services (waste collection, cleaning, renewable energy). |  |  |  |  |  |
